# Supplementary material
Source: PubMed Central journal article supplement (PMC8329935)
Supplement: NIHMS1645038-supplement-1.pdf [file NIHMS1645038-supplement-1.pdf]

Table 1A: Simulated rejection probabilities for noninferiority testing under three event-rate settings with 3 years of accrual followed by 3 years of follow-up using proportional hazards (Cox) and RMST methods with  $\tau=5$

| Noninferiority designs                                                     |              |                     |                     |                       |                    |                         |                     |                       |                    |                        |
|----------------------------------------------------------------------------|--------------|---------------------|---------------------|-----------------------|--------------------|-------------------------|---------------------|-----------------------|--------------------|------------------------|
| NI Margin                                                                  |              | Sample size per arm | Simulated powers    |                       |                    |                         | Simulated levels    |                       |                    |                        |
| HR                                                                         | RMST (years) |                     | 5-yr surv (Exp arm) | 5-yr surv (contr arm) | RMST* ( $\tau=5$ ) | Proportional Hazards ** | 5-yr surv (Exp arm) | 5-yr surv (contr arm) | RMST* ( $\tau=5$ ) | Proportional Hazards** |
| <u>Low</u> event-rate setting: 90% 3-year survival on the best arm(s)      |              |                     |                     |                       |                    |                         |                     |                       |                    |                        |
| 2                                                                          | .37          | 250                 | 84%                 | 84%                   | <b>.956</b>        | <b>.834</b>             | 70%                 | 84%                   | <b>.0260</b>       | <b>.0258</b>           |
| 1.75                                                                       | .28          | 450                 | 84%                 | 84%                   | <b>.964</b>        | <b>.889</b>             | 74%                 | 84%                   | <b>.0261</b>       | <b>.0258</b>           |
| 1.5                                                                        | .19          | 1000                | 84%                 | 84%                   | <b>.967</b>        | <b>.932</b>             | 77%                 | 84%                   | <b>.0262</b>       | <b>.0262</b>           |
| 1.25                                                                       | .10          | 3750                | 84%                 | 84%                   | <b>.961</b>        | <b>.957</b>             | 80%                 | 84%                   | <b>.0249</b>       | <b>.0246</b>           |
| <u>Moderate</u> event-rate setting: 60% 3-year survival on the best arm(s) |              |                     |                     |                       |                    |                         |                     |                       |                    |                        |
| 2                                                                          | .96          | 75                  | 43%                 | 43%                   | <b>.913</b>        | <b>.863</b>             | 18%                 | 43%                   | <b>.0237</b>       | <b>.0253</b>           |
| 1.75                                                                       | .77          | 125                 | 43%                 | 43%                   | <b>.925</b>        | <b>.892</b>             | 23%                 | 43%                   | <b>.0242</b>       | <b>.0255</b>           |
| 1.5                                                                        | .54          | 250                 | 43%                 | 43%                   | <b>.925</b>        | <b>.907</b>             | 28%                 | 43%                   | <b>.0245</b>       | <b>.0256</b>           |
| 1.25                                                                       | .29          | 1000                | 43%                 | 43%                   | <b>.951</b>        | <b>.953</b>             | 35%                 | 43%                   | <b>.0251</b>       | <b>.0253</b>           |
| <u>High</u> event-rate setting: 20% 3-year survival on the best arm(s)***  |              |                     |                     |                       |                    |                         |                     |                       |                    |                        |
| 2                                                                          | .81          | 50                  | 7%                  | 7%                    | <b>.787</b>        | <b>.900</b>             | 0.5%                | 7%                    | <b>.0292</b>       | <b>.0249</b>           |
| 1.75                                                                       | .68          | 75                  | 7%                  | 7%                    | <b>.806</b>        | <b>.897</b>             | 1%                  | 7%                    | <b>.0280</b>       | <b>.0246</b>           |
| 1.5                                                                        | .52          | 150                 | 7%                  | 7%                    | <b>.854</b>        | <b>.913</b>             | 2%                  | 7%                    | <b>.0265</b>       | <b>.0250</b>           |
| 1.25                                                                       | .30          | 450                 | 7%                  | 7%                    | <b>.853</b>        | <b>.888</b>             | 4%                  | 7%                    | <b>.0256</b>       | <b>.0251</b>           |

\* RMST analysis with  $\tau=5$  performed after 3 years of accrual followed by 3 years of follow-up (6 years after study activation)

\*\* Proportional hazards analysis performed after 3 years of accrual followed by 3 years of follow-up (6 years after study activation)

\*\*\* In trial replications where the minimum of the longest observed times on each arm was less than 5 years  $\tau$  was set to the minimum of the longest observed times on the two arms (Tian et al.<sup>31</sup>)

Table 2A: Simulated rejection probabilities for superiority testing under three event-rate settings with 3 years of accrual followed by 3 years of follow-up using proportional hazards (Cox) and RMST methods with  $\tau=5$

| Superiority designs                                                        |              |                     |                     |                       |                    |                        |                     |                       |                    |                        |
|----------------------------------------------------------------------------|--------------|---------------------|---------------------|-----------------------|--------------------|------------------------|---------------------|-----------------------|--------------------|------------------------|
| Target effect                                                              |              | Sample size per arm | Simulated powers    |                       |                    |                        | Simulated levels    |                       |                    |                        |
| HR                                                                         | RMST (years) |                     | 5-yr surv (Exp arm) | 5-yr surv (Contr arm) | RMST* ( $\tau=5$ ) | Proportional Hazards** | 5-yr surv (Exp arm) | 5-yr surv (contr arm) | RMST* ( $\tau=5$ ) | Proportional Hazards** |
| <u>Low</u> event-rate setting: 90% 3-year survival on the best arm(s)      |              |                     |                     |                       |                    |                        |                     |                       |                    |                        |
| ½                                                                          | .37          | 250                 | 84%                 | 70%                   | <b>.892</b>        | <b>.933</b>            | 70%                 | 70%                   | <b>.0249</b>       | <b>.0241</b>           |
| 1/1.75                                                                     | .28          | 450                 | 84%                 | 74%                   | <b>.919</b>        | <b>.954</b>            | 74%                 | 74%                   | <b>.0252</b>       | <b>.0247</b>           |
| 1/1.5                                                                      | .19          | 1000                | 84%                 | 77%                   | <b>.938</b>        | <b>.967</b>            | 77%                 | 77%                   | <b>.0256</b>       | <b>.0251</b>           |
| 1/1.25                                                                     | .10          | 3750                | 84%                 | 80%                   | <b>.945</b>        | <b>.973</b>            | 80%                 | 80%                   | <b>.0247</b>       | <b>.0243</b>           |
| <u>Moderate</u> event-rate setting: 60% 3-year survival on the best arm(s) |              |                     |                     |                       |                    |                        |                     |                       |                    |                        |
| ½                                                                          | .96          | 75                  | 43%                 | 18%                   | <b>.912</b>        | <b>.925</b>            | 18%                 | 18%                   | <b>.0265</b>       | <b>.0247</b>           |
| 1/1.75                                                                     | .77          | 125                 | 43%                 | 23%                   | <b>.922</b>        | <b>.937</b>            | 23%                 | 23%                   | <b>.0263</b>       | <b>.0245</b>           |
| 1/1.5                                                                      | .54          | 250                 | 43%                 | 28%                   | <b>.920</b>        | <b>.939</b>            | 28%                 | 28%                   | <b>.0253</b>       | <b>.0251</b>           |
| 1/1.25                                                                     | .29          | 1000                | 43%                 | 35%                   | <b>.948</b>        | <b>.965</b>            | 35%                 | 35%                   | <b>.0256</b>       | <b>.0254</b>           |
| <u>High</u> event-rate setting: 20% 3-year survival on the best arm(s)***  |              |                     |                     |                       |                    |                        |                     |                       |                    |                        |
| ½                                                                          | .81          | 50                  | 7%                  | 0.5%                  | <b>.899</b>        | <b>.913</b>            | 0.5%                | 0.5%                  | <b>.0236</b>       | <b>.0263</b>           |
| 1/1.75                                                                     | .68          | 75                  | 7%                  | 1%                    | <b>.900</b>        | <b>.909</b>            | 1%                  | 1%                    | <b>.0236</b>       | <b>.0256</b>           |
| 1/1.5                                                                      | .52          | 150                 | 7%                  | 2%                    | <b>.919</b>        | <b>.922</b>            | 2%                  | 2%                    | <b>.0242</b>       | <b>.0250</b>           |
| 1/1.25                                                                     | .30          | 450                 | 7%                  | 4%                    | <b>.892</b>        | <b>.895</b>            | 4%                  | 4%                    | <b>.0254</b>       | <b>.0252</b>           |

\* RMST analysis with  $\tau=5$  performed after 3 years of accrual followed by 3 years of follow-up (6 years after study activation)

\*\* Proportional hazards analysis performed after 3 years of accrual followed by 3 years of follow-up (6 years after study activation)

\*\*\* In trial replications where the minimum of the longest observed times on each arm was less than 5 years  $\tau$  was set to the minimum of the longest observed times on the two arms (Tian et al.<sup>31</sup>)

Table 3A: Simulated rejection probabilities for noninferiority testing **rare event setting**: 96% 3-year survival on the best arm(s)

| <b>Noninferiority designs</b>                                   |              |                     |                     |                       |                    |                        |                     |                       |                    |                        |
|-----------------------------------------------------------------|--------------|---------------------|---------------------|-----------------------|--------------------|------------------------|---------------------|-----------------------|--------------------|------------------------|
| NI Margin                                                       |              | Sample size per arm | Simulated powers    |                       |                    |                        | Simulated levels    |                       |                    |                        |
| HR                                                              | RMST (years) |                     | 5-yr surv (Exp arm) | 5-yr surv (contr arm) | RMST* ( $\tau=5$ ) | Proportional Hazards** | 5-yr surv (Exp arm) | 5-yr surv (contr arm) | RMST* ( $\tau=5$ ) | Proportional Hazards** |
| Rare event-rate setting: 96% 3-year survival on the best arm(s) |              |                     |                     |                       |                    |                        |                     |                       |                    |                        |
| 2                                                               | .16          | 500                 | 93%                 | 93%                   | <b>.926</b>        | <b>.752</b>            | 87%                 | 93%                   | <b>.0288</b>       | <b>.0260</b>           |
| 1.75                                                            | .12          | 900                 | 93%                 | 93%                   | <b>.931</b>        | <b>.817</b>            | 89%                 | 93%                   | <b>.0275</b>       | <b>.0258</b>           |
| 1.5                                                             | .08          | 2000                | 93%                 | 93%                   | <b>.932</b>        | <b>.872</b>            | 90%                 | 93%                   | <b>.0254</b>       | <b>.0251</b>           |
| 1.25                                                            | .04          | 7500                | 93%                 | 93%                   | <b>.921</b>        | <b>.913</b>            | 92%                 | 93%                   | <b>.0257</b>       | <b>.0255</b>           |

\* RMST analysis with  $\tau=5$  performed after 3 years of accrual followed by 3 years of follow-up (6 years after study activation)

\*\* Proportional hazards analysis performed after 3 years of accrual followed by 3 years of follow-up (6 years after study activation)

Table 4A: Simulated rejection probabilities for superiority testing under **rare event setting**: 96% 3-year survival on the best arm(s)

| <b>Superiority designs</b>                                      |              |                     |                     |                       |                    |                        |                     |                       |                    |                        |
|-----------------------------------------------------------------|--------------|---------------------|---------------------|-----------------------|--------------------|------------------------|---------------------|-----------------------|--------------------|------------------------|
| Target effect                                                   |              | Sample size per arm | Simulated powers    |                       |                    |                        | Simulated levels    |                       |                    |                        |
| HR                                                              | RMST (years) |                     | 5-yr surv (Exp arm) | 5-yr surv (Contr arm) | RMST* ( $\tau=5$ ) | Proportional Hazards** | 5-yr surv (Exp arm) | 5-yr surv (contr arm) | RMST* ( $\tau=5$ ) | Proportional Hazards** |
| Rare event-rate setting: 96% 3-year survival on the best arm(s) |              |                     |                     |                       |                    |                        |                     |                       |                    |                        |
| 1/2                                                             | .16          | 500                 | 93%                 | 87%                   | <b>.824</b>        | <b>.882</b>            | 87%                 | 87%                   | <b>.0258</b>       | <b>.0246</b>           |
| 1/1.75                                                          | .12          | 900                 | 93%                 | 89%                   | <b>.854</b>        | <b>.910</b>            | 89%                 | 89%                   | <b>.0256</b>       | <b>.0246</b>           |
| 1/1.5                                                           | .08          | 2000                | 93%                 | 90%                   | <b>.879</b>        | <b>.929</b>            | 90%                 | 90%                   | <b>.0243</b>       | <b>.0241</b>           |
| 1/1.25                                                          | .04          | 7500                | 93%                 | 92%                   | <b>.893</b>        | <b>.940</b>            | 92%                 | 92%                   | <b>.0254</b>       | <b>.0249</b>           |

\* RMST analysis with  $\tau=5$  performed after 3 years of accrual followed by 3 years of follow-up (6 years after study activation)

\*\* Proportional hazards analysis performed after 3 years of accrual followed by 3 years of follow-up (6 years after study activation)
